# Supplementary material
Source: PubMed Central journal article supplement (PMC4212725)
Supplement: nn505338e_si_001.pdf [file nn505338e_si_001.pdf]

# SUPPORTING INFORMATION

## A Complementary Palette of NanoCluster Beacons

Judy M. Obliosca<sup>†‡</sup>, Mark C. Babin<sup>§‡</sup>, Cong Liu<sup>†</sup>, Yen-Liang Liu<sup>†</sup>, Yu-An Chen<sup>†</sup>, Robert A. Batson<sup>†</sup>, Mainak Ganguly<sup>||</sup>, Jeffrey T. Petty<sup>\*||</sup>, Hsin-Chih Yeh<sup>\*†</sup>

<sup>†</sup>Department of Biomedical Engineering, University of Texas at Austin, Austin, Texas 78712, USA

<sup>§</sup>Department of Chemistry, University of Texas at Austin, Austin, TX 78712, USA

<sup>||</sup>Department of Chemistry, Furman University, Greenville, SC 29613, USA

<sup>‡</sup>Equal contribution

### Contents:

|             |                                                                                                                                       |    |
|-------------|---------------------------------------------------------------------------------------------------------------------------------------|----|
| <b>I.</b>   | <b>NanoCluster Beacons in the C-, S- and P-series Experiments</b> .....                                                               | 2  |
|             | Table S1. Oligonucleotide sequences of NCBs in C-, S-, and P-series.....                                                              | 2  |
|             | Figure S1. Normalized 2D fluorescence contour plots of NCBs in S-series.....                                                          | 3  |
|             | Figure S2. Schematic representation of NCBs in C-series .....                                                                         | 4  |
|             | Figure S3. Schematic representation of NCBs in S-series .....                                                                         | 5  |
|             | Figure S4. Schematic representation of NCBs in P-series.....                                                                          | 6  |
|             | Figure S5. Color photos of NCBs in C-, S- and P-series.....                                                                           | 7  |
|             | Table S2. Enhancement ratios of S-series NCBs.....                                                                                    | 8  |
|             | Table S3. Enhancement ratios of P-series NCBs .....                                                                                   | 8  |
|             | Figure S6. Enhancement ratios of C-series NCBs.....                                                                                   | 9  |
|             | Figure S7. Normalized excitation/emission spectra of C <sub>8-8</sub> , C <sub>5-5</sub> , C <sub>3-4</sub> and C <sub>3-3</sub> .... | 10 |
| <b>II.</b>  | <b>NanoCluster Beacons in the 32 Linker Variation Experiments</b> .....                                                               | 11 |
|             | Table S4. DNA sequences of 32 NC probes.....                                                                                          | 11 |
|             | Table S5. Enhancement ratios of 32 NCBs .....                                                                                         | 12 |
|             | Figure S8. Enhancement ratios of 32 NCBs .....                                                                                        | 13 |
|             | Figure S9. Color photos of 32 NCBs .....                                                                                              | 14 |
|             | Figure S10. Emission peaks of selected NCBs.....                                                                                      | 15 |
| <b>III.</b> | <b>Symmetry on NCB's Spectral Profile</b> .....                                                                                       | 16 |
|             | <b>Reference</b> .....                                                                                                                | 16 |

## I. NanoCluster Beacons in C-, P-, and S-series

**Table S1. Oligonucleotide sequences of NCBs in C-, S-, and P-series.** In the NC probes, the polycytosine heads are shown in blue, the linker in purple, the substituted cytosine in green, and the hybridization sequence in black. The G-rich enhancer sequence in the common enhancer probe is shown in red.

| Name             | DNA Sequence (5'→3')                                          |
|------------------|---------------------------------------------------------------|
|                  | <b>C-Series NC Probe</b>                                      |
| C <sub>2-2</sub> | CC TTAAT CC TAT AAT AAA TTT TAA ATA TTA TTT ATT AAT           |
| C <sub>3-3</sub> | CCC TTAAT CCC TAT AAT AAA TTT TAA ATA TTA TTT ATT AAT         |
| C <sub>3-4</sub> | CCC TTAAT CCCC TAT AAT AAA TTT TAA ATA TTA TTT ATT AAT        |
| C <sub>4-3</sub> | CCCC TTAAT CCC TAT AAT AAA TTT TAA ATA TTA TTT ATT AAT        |
| C <sub>4-4</sub> | CCCC TTAAT CCCC TAT AAT AAA TTT TAA ATA TTA TTT ATT AAT       |
| C <sub>5-5</sub> | CCCCCTTAAT CCCCC TAT AAT AAA TTT TAA ATA TTA TTT ATT AAT      |
| C <sub>6-6</sub> | CCCCCCTTAAT CCCCCC TAT AAT AAA TTT TAA ATA TTA TTT ATT AAT    |
| C <sub>7-7</sub> | CCCCCCC TTAAT CCCCCC TAT AAT AAA TTT TAA ATA TTA TTT ATT AAT  |
| C <sub>8-8</sub> | CCCCCCCC TTAAT CCCCCC TAT AAT AAA TTT TAA ATA TTA TTT ATT AAT |
|                  | <b>P-Series NC Probe</b>                                      |
| P1               | CCC TTAAT CCCC TAT AAT AAA TTT TAA ATA TTA TTT ATT AAT        |
| P2               | CCC TCAAT CCCC TAT AAT AAA TTT TAA ATA TTA TTT ATT AAT        |
| P3               | CCC TTAAT CCCC TAT AAT AAA TTT TAA ATA TTA TTT ATT AAT        |
| P4               | CCC TTAAT CCCC TAT AAT AAA TTT TAA ATA TTA TTT ATT AAT        |
| P5               | CCC TTAAT CCCC TAT AAT AAA TTT TAA ATA TTA TTT ATT AAT        |
|                  | <b>S-Series NC Probe</b>                                      |
| S10              | CCC TTAATTAATT CCCC TAT AAT AAA TTT TAA ATA TTA TTT ATT AAT   |
| S9               | CCC TTAATTAAT CCCC TAT AAT AAA TTT TAA ATA TTA TTT ATT AAT    |
| S8               | CCC TTAATTAAT CCCC TAT AAT AAA TTT TAA ATA TTA TTT ATT AAT    |
| S7               | CCC TTAATTA CCCC TAT AAT AAA TTT TAA ATA TTA TTT ATT AAT      |
| S6               | CCC TTAATT CCCC TAT AAT AAA TTT TAA ATA TTA TTT ATT AAT       |
| S5               | CCC TTAAT CCCC TAT AAT AAA TTT TAA ATA TTA TTT ATT AAT        |
| S4               | CCC TTAAT CCCC TAT AAT AAA TTT TAA ATA TTA TTT ATT AAT        |
| S3               | CCC TTA CCCC TAT AAT AAA TTT TAA ATA TTA TTT ATT AAT          |
| S2               | CCC TT CCCC TAT AAT AAA TTT TAA ATA TTA TTT ATT AAT           |
| S1               | CCC T CCCC TAT AAT AAA TTT TAA ATA TTA TTT ATT AAT            |
| S0               | CCC CCCC TAT AAT AAA TTT TAA ATA TTA TTT ATT AAT              |
|                  | <b>Common Enhancer Probe</b>                                  |
|                  | ATT AAT AAA TAA TAT TTA AAA TTT ATT ATA GGGTGGGGTGGGGTGGGG    |

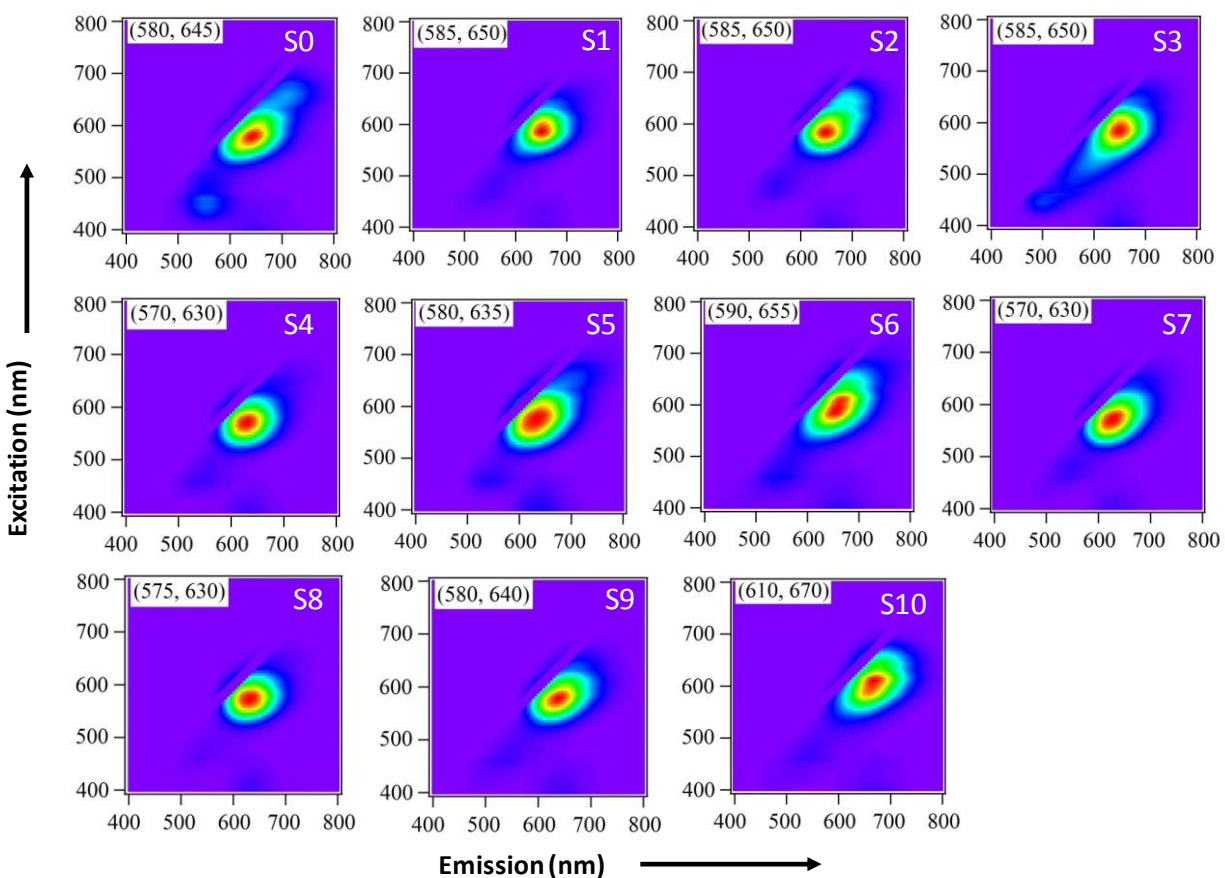

**Figure S1. Normalized 2D fluorescence contour plots of NCBs in S-series.** The peaks of these 2D spectra are nearly identical and the emission patterns are relatively pure (as compared to C- and P-series). However, these spectra differ in the symmetry of their spectral profiles. S1-4 & S8 have symmetric profiles (eccentricity  $< 0.66$ ) while S0, S5-7 & S9-10 have asymmetric profiles (eccentricity  $\geq 0.66$ ).

## C-series Design

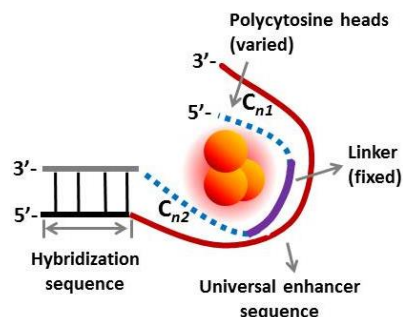

| Name             | Sequence                                                                                                                                                                                         | No. of polycytosines | Eccentricity of major spectral peaks | Major emission peak (nm) | $Fl_{max}$ of major peak (a. u.) | $Fl_{max}$ of 2° peak (a. u.) | Spectral purity |
|------------------|--------------------------------------------------------------------------------------------------------------------------------------------------------------------------------------------------|----------------------|--------------------------------------|--------------------------|----------------------------------|-------------------------------|-----------------|
| C <sub>2-2</sub> | A T A T <span style="background-color: yellow;">C C</span> T A A T T <span style="background-color: yellow;">C C</span> -5'<br>T A T A G G G T G G G G T G G G G T G G G G-3'                    | 4                    | 0.53                                 | 650                      | 0.93                             | 0.06 (6%)                     | relatively pure |
| C <sub>3-3</sub> | A T A T <span style="background-color: yellow;">C C C</span> T A A T T <span style="background-color: yellow;">C C C</span><br>T A T A G G G T G G G G T G G G G T G G G G                       | 6                    | 0.78                                 | 695                      | 2.3                              | 2.0 (87%)                     | not pure        |
| C <sub>3-4</sub> | A T A T <span style="background-color: yellow;">C C C C</span> T A A T T <span style="background-color: yellow;">C C C</span><br>T A T A G G G T G G G G T G G G G T G G G G                     | 7                    | 0.76                                 | 635                      | 8.0                              | 1.2 (15%)                     | relatively pure |
| C <sub>4-4</sub> | A T A T <span style="background-color: yellow;">C C C C C</span> T A A T T <span style="background-color: yellow;">C C C C</span><br>T A T A G G G T G G G G T G G G G T G G G G                 | 8                    | 0.79                                 | 635                      | 1.3                              | 0.47 (36%)                    | not pure        |
| C <sub>5-5</sub> | A T A T <span style="background-color: yellow;">C C C C C C</span> T A A T T <span style="background-color: yellow;">C C C C C</span><br>T A T A G G G T G G G G T G G G G T G G G G             | 10                   | 0.57                                 | 585                      | 10                               | 1.7 (17%)                     | relatively pure |
| C <sub>6-6</sub> | A T A T <span style="background-color: yellow;">C C C C C C C</span> T A A T T <span style="background-color: yellow;">C C C C C C</span><br>T A T A G G G T G G G G T G G G G T G G G G         | 12                   | 0.64                                 | 590                      | 12                               | 5.6 (47%)                     | not pure        |
| C <sub>7-7</sub> | A T A T <span style="background-color: yellow;">C C C C C C C C</span> T A A T T <span style="background-color: yellow;">C C C C C C C</span><br>T A T A G G G T G G G G T G G G G T G G G G     | 14                   | 0.74                                 | 590                      | 3.6                              | 3.2 (89%)                     | not pure        |
| C <sub>8-8</sub> | A T A T <span style="background-color: yellow;">C C C C C C C C C</span> T A A T T <span style="background-color: yellow;">C C C C C C C C</span><br>T A T A G G G T G G G G T G G G G T G G G G | 16                   | 0.81                                 | 555                      | 7.4                              | 0.45 (6%)                     | relatively pure |

|||| Hybridization sequence          Polycytosine heads under investigation

**Figure S2. Schematic representation of NCBs in C-series.** The C-series NCBs consist of a set of NC probes differing in the size of polycytosine heads but having an identical linker sequence between the heads. **Upper:** Schematic diagram showing the conceptual arrangement of the polycytosine heads, linker, enhancer and hybridization sequences in the C-series (not drawn to scale). **Lower:** Alignment of the cluster-nucleation sequence with respect to the G-rich enhancer sequence, number of cytosines in the cluster-nucleation sequence, the eccentricity of major spectral peaks, the major emission peaks and the spectral purity of the C-series NCBs. A 2D fluorescence contour plot is defined as “relatively spectrally pure” if the fluorescence intensity of its secondary (2°) peak is less than 25% of its major peak intensity. C<sub>3-4</sub> represents a design with a C<sub>3</sub> and a C<sub>4</sub> polycytosine heads. C<sub>3-4</sub> is the first NCB reported,<sup>1</sup> which serves as the gold standard in this report.

## S-series Design

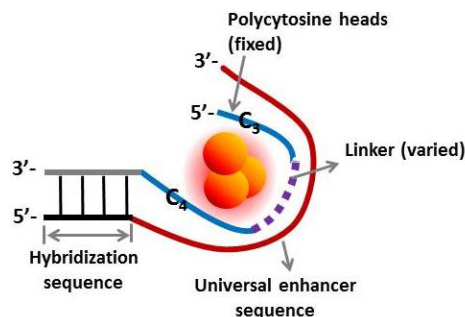

| Name | Sequence                                                                            | Eccentricity of major spectral peaks | Major emission peak (nm) | Fl <sub>max</sub> of major peak (a. u.) | Fl <sub>max</sub> of 2 <sup>o</sup> peak (a. u.) | Spectral purity |
|------|-------------------------------------------------------------------------------------|--------------------------------------|--------------------------|-----------------------------------------|--------------------------------------------------|-----------------|
| S0   | ATAT C C C C C C C-5'<br>TAT A G G G T G G G G T G G G G T G G G G G-3'             | 0.80                                 | 645                      | 3.7                                     | 0.89 (24%)                                       | relatively pure |
| S1   | ATAT C C C C T C C C<br>TAT A G G G T G G G G T G G G G T G G G G                   | 0.52                                 | 650                      | 4.1                                     | 0.52 (13%)                                       | relatively pure |
| S2   | ATAT C C C C T T C C C<br>TAT A G G G T G G G G T G G G G T G G G G                 | 0.59                                 | 650                      | 6.9                                     | 2.3 (33%)                                        | not pure        |
| S3   | ATAT C C C C A T T C C C<br>TAT A G G G T G G G G T G G G G T G G G G               | 0.59                                 | 650                      | 9.1                                     | 2.2 (24%)                                        | relatively pure |
| S4   | ATAT C C C C A A T T C C C<br>TAT A G G G T G G G G T G G G G T G G G G             | 0.61                                 | 630                      | 8.1                                     | 0.80 (10%)                                       | relatively pure |
| S5   | ATAT C C C C T A A T T C C C<br>TAT A G G G T G G G G T G G G G T G G G G           | 0.76                                 | 640                      | 8.0                                     | 1.2 (15%)                                        | relatively pure |
| S6   | ATAT C C C C T T A A T T C C C<br>TAT A G G G T G G G G T G G G G T G G G G         | 0.79                                 | 655                      | 2.5                                     | 0.42 (17%)                                       | relatively pure |
| S7   | ATAT C C C C A T T A A T T C C C<br>TAT A G G G T G G G G T G G G G T G G G G       | 0.74                                 | 630                      | 7.1                                     | 0.91 (13%)                                       | relatively pure |
| S8   | ATAT C C C C A A T T A A T T C C C<br>TAT A G G G T G G G G T G G G G T G G G G     | 0.59                                 | 630                      | 11                                      | 1.3 (12%)                                        | relatively pure |
| S9   | ATAT C C C C T A A T T A A T T C C C<br>TAT A G G G T G G G G T G G G G T G G G G   | 0.78                                 | 640                      | 5.3                                     | 0.73 (14%)                                       | relatively pure |
| S10  | ATAT C C C C T T A A T T A A T T C C C<br>TAT A G G G T G G G G T G G G G T G G G G | 0.73                                 | 670                      | 3.8                                     | 0.42 (11%)                                       | relatively pure |

 Hybridization sequence
  Linker(s) under investigation

**Figure S3. Schematic representation of NCBs in S-series.** The S-series NCBs consist of a set of NC probes differing in the linker length but having identical polycytosine heads. **Upper:** Schematic diagram showing the conceptual arrangement of the polycytosine heads, linker, enhancer and hybridization sequences in the S-series (not drawn to scale). **Lower:** Alignment of the cluster-nucleation sequence with respect to the G-rich enhancer sequence, the eccentricity of major spectral peaks, the major emission peaks and the spectral purity of the S-series NCBs. S3 denotes design with a 3-nt long linker. Here S5 is identical to the gold standard C<sub>3-4</sub>.

## P-series Design

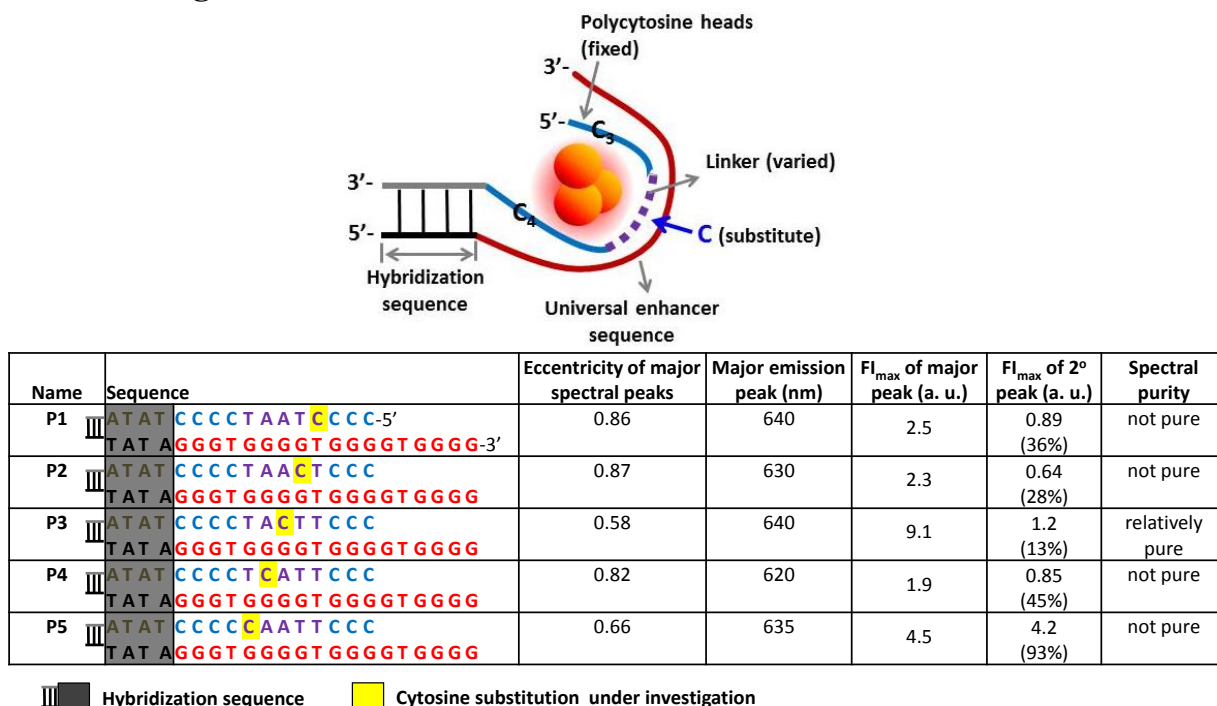

**Figure S4. Schematic representation of NCBs in P-series.** The P-series NCBs consist of a set of NC probes differing in the cytosine substitution location in the linker. **Upper:** Schematic diagram showing the conceptual arrangement of the polycytosine heads, linker, enhancer and hybridization sequences, and the location of the substituted cytosine in the linker (not drawn to scale). **Lower:** Alignment of the cluster-nucleation sequence with respect to the G-rich enhancer sequence, the eccentricity of major spectral peaks, the major emission peaks and the spectral purity of the P-series NCBs. P3 denotes a design with the 3<sup>rd</sup> linker nucleotide being substituted with a cytosine.

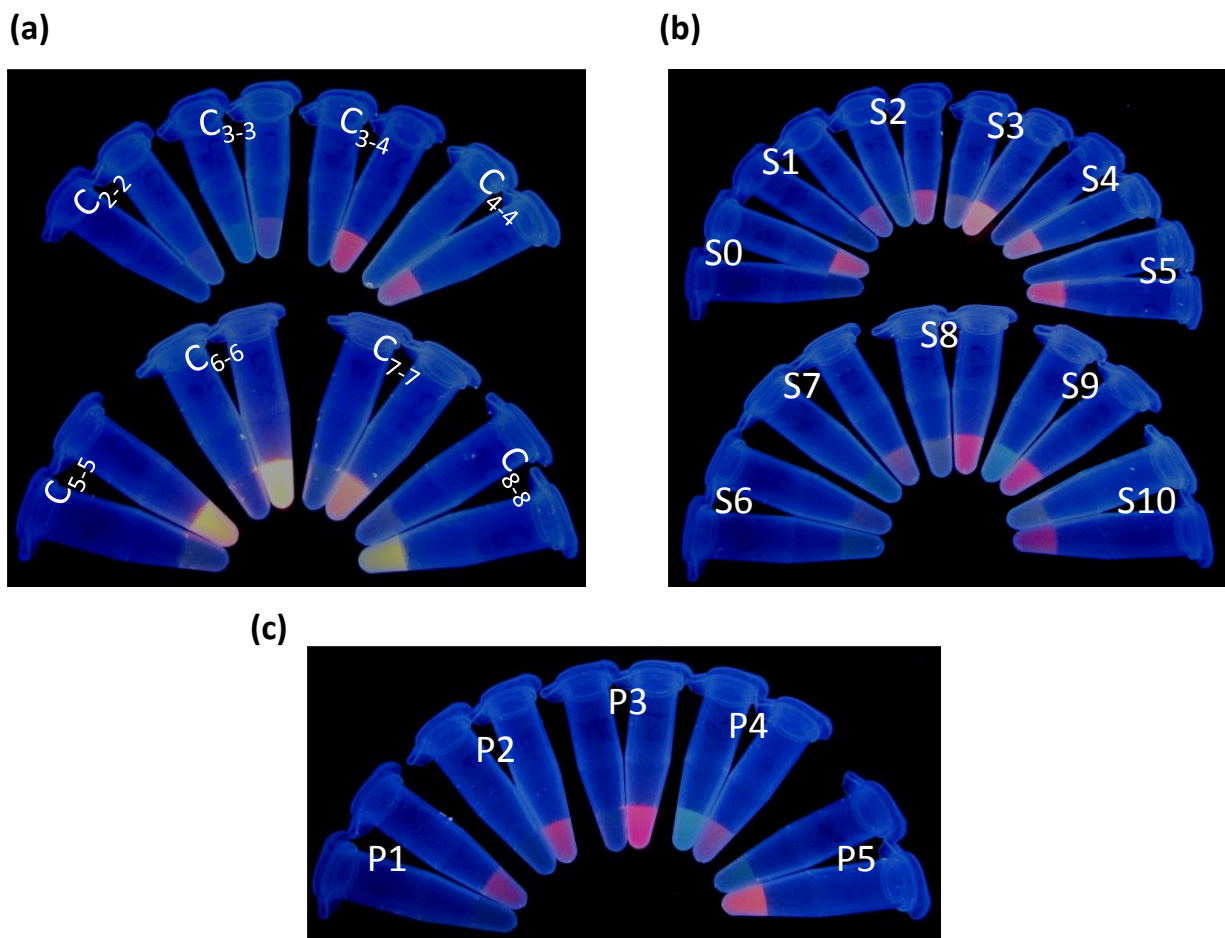

**Figure S5.** Color photos of NCBs in (a) C-series, (b) S-series and (c) P-series. For each sample subset, the left vial contained the inactivated NCB (*i.e.* NC probe only) while the right vial contained the activated NCB (*i.e.* the duplex). Photos were taken 24 hrs (samples stored at  $-20\text{ }^{\circ}\text{C}$ ) after the fluorescence measurements were completed.  $\lambda_{\text{ex}} = 365\text{ nm}$ . NCBs were prepared at  $15\text{ }\mu\text{M}$  concentration.

**Table S2. Enhancement ratios of S-series NCBs.** The enhancement ratios were estimated based on the 1D scans using a fixed excitation wavelength of 580 nm and calculated as  $(I_{\text{activated}} - I_{\text{buffer}}) / (I_{\text{inactivated}} - I_{\text{buffer}})$ . Fluorescence intensities before and after activation were integrated from 595 nm to 740 nm. All emission intensities after activation were compared to the gold standard, S5 (also C<sub>3-4</sub>), whose relative intensity is set to 100%.

| S-series | Sequence variation (5' --> 3') | Background fluorescence intensity before activation (a. u.) | Emission intensity after activation (a. u.) | Enhancement ratio |
|----------|--------------------------------|-------------------------------------------------------------|---------------------------------------------|-------------------|
| S0       | CCCCCCC                        | 8.7 ± 0.04                                                  | 498 ± 7 (46 %)                              | 57 ± 1            |
| S1       | CCCTCCCC                       | 2.2 ± 0.02                                                  | 778 ± 39 (71 %)                             | 356 ± 15          |
| S2       | CCCTTCCCC                      | 1.5 ± 0.04                                                  | 709 ± 22 (65 %)                             | 479 ± 28          |
| S3       | CCCTTACCCC                     | 3.0 ± 0.08                                                  | 984 ± 21 (90 %)                             | 324 ± 7           |
| S4       | CCCTTAACCCC                    | 1.2 ± 0.11                                                  | 992 ± 34 (91 %)                             | 824 ± 105         |
| S5       | CCCTTAATCCCC                   | 0.3 ± 0.09                                                  | 1094 ± 18 (100 %)                           | 3465 ± 928        |
| S6       | CCCTTAATTCCCC                  | 1.1 ± 0.07                                                  | 266 ± 19 (24 %)                             | 238 ± 17          |
| S7       | CCCTTAATTACCCC                 | 1.3 ± 0.20                                                  | 874 ± 87 (80 %)                             | 659 ± 87          |
| S8       | CCCTTAATTAACCCC                | 1.9 ± 0.23                                                  | 966 ± 5 (88 %)                              | 527 ± 73          |
| S9       | CCCTTAATTAATCCCC               | 1.8 ± 0.05                                                  | 724 ± 11 (66 %)                             | 398 ± 17          |
| S10      | CCCTTAATTAATTCCCC              | 1.5 ± 0.07                                                  | 339 ± 3 (31 %)                              | 219 ± 11          |

**Table S3. Enhancement ratios of P-series NCBs.** The enhancement ratios were estimated based on the 1D scans using a fixed excitation wavelength of 580 nm and calculated as  $(I_{\text{activated}} - I_{\text{buffer}}) / (I_{\text{inactivated}} - I_{\text{buffer}})$ . Fluorescence intensities before and after activation were integrated from 595 nm to 740 nm. All emission intensities after activation were compared to the gold standard, S5 (also C<sub>3-4</sub>), whose relative intensity is set to 100%.

| P-series | Sequence variation (5' --> 3') | Background fluorescence intensity before activation (a. u.) | Emission intensity after activation (a. u.) | Enhancement ratio |
|----------|--------------------------------|-------------------------------------------------------------|---------------------------------------------|-------------------|
| P1       | CCC CTAAT CCCC                 | 1.8 ± 0.02                                                  | 297 ± 14 (27 %)                             | 161 ± 9           |
| P2       | CCC TCAAT CCCC                 | 0.8 ± 0.09                                                  | 337 ± 25 (31 %)                             | 413 ± 79          |
| P3       | CCC TTCAT CCCC                 | 1.5 ± 0.09                                                  | 851 ± 14 (78 %)                             | 579 ± 27          |
| P4       | CCC TTAAT CCCC                 | 2.1 ± 0.02                                                  | 275 ± 7 (25 %)                              | 132 ± 5           |
| P5       | CCC TTAAC CCCC                 | 2.4 ± 0.04                                                  | 662 ± 33 (61 %)                             | 277 ± 18          |



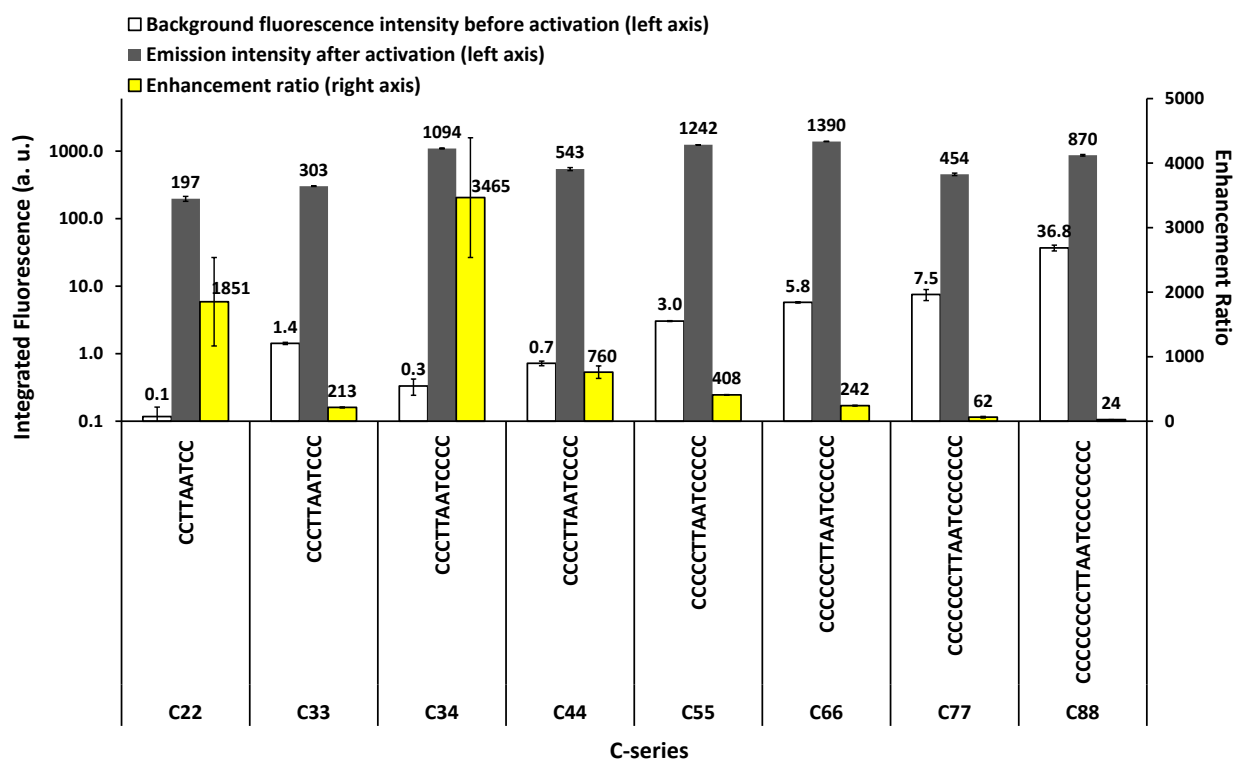

| C-series         | $\lambda_{ex}$ (nm) | $\lambda_{em}$ (nm) | Integration range (nm) |
|------------------|---------------------|---------------------|------------------------|
| C <sub>2-2</sub> | 580                 | 650                 | 595-740                |
| C <sub>3-3</sub> | 645                 | 695                 | 655-800                |
| C <sub>3-4</sub> | 580                 | 640                 | 595-740                |
| C <sub>4-4</sub> | 580                 | 635                 | 595-740                |
| C <sub>5-5</sub> | 525                 | 585                 | 535-680                |
| C <sub>6-6</sub> | 525                 | 590                 | 535-680                |
| C <sub>7-7</sub> | 525                 | 590                 | 535-680                |
| C <sub>8-8</sub> | 460                 | 555                 | 470-615                |

**Figure S6. Enhancement ratios of C-series NCBs.** Because the emission peak varies greatly in C-series experiment, the brightness and enhancement ratios of the NCB were compared using the maximum excitation depicted on each design (see Table right below Figure S6). The fluorescence intensities before and after activation were integrated at different spectral bands but with a fixed bandwidth of 145 nm.

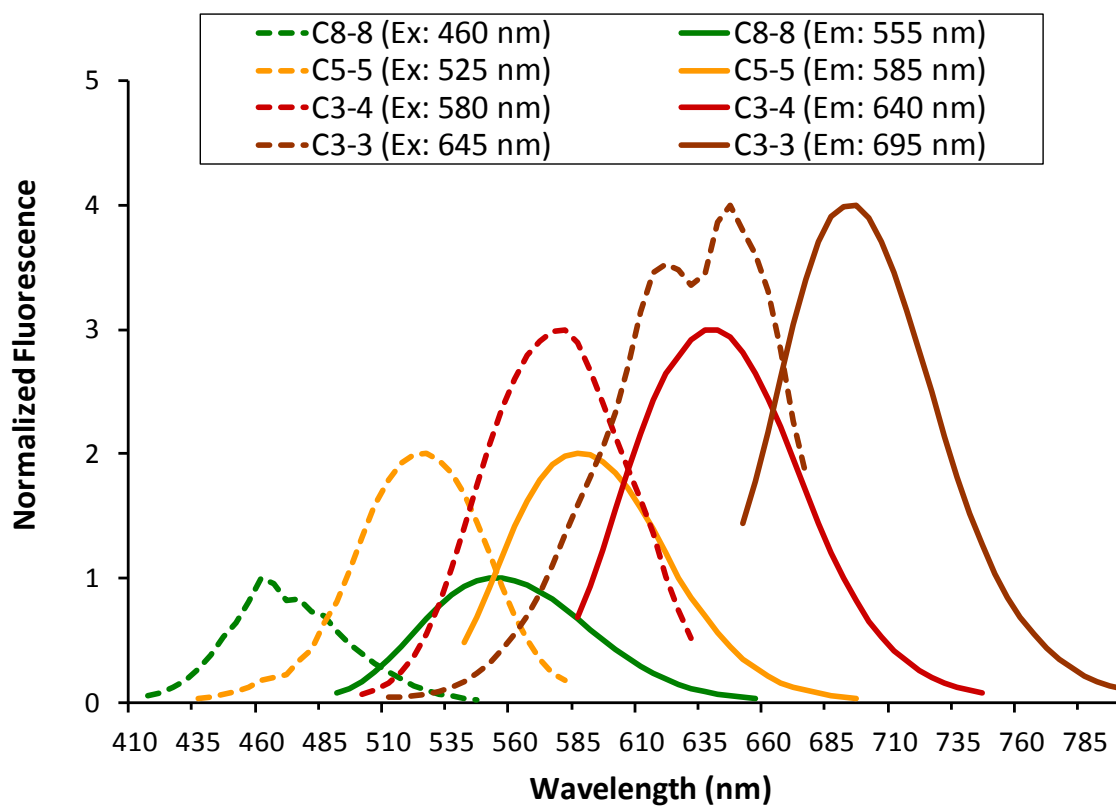

**Figure S7. Normalized excitation/emission spectra of C<sub>8-8</sub>, C<sub>5-5</sub>, C<sub>3-4</sub> and C<sub>3-3</sub>.** Dashed lines represent the excitation spectra while solid lines represent the emission spectra. Normalization scale is set differently to ease visualization.

## II. NanoCluster Beacons in the 32 Linker Variation Experiments

In this separate set of experiments, we varied the composition of the linker (5 nt long and made of only T or A) and generated 32 (a permutation of  $2^5$ ) distinct cluster-nucleation sequences for investigation (Tables S4 and S5). We found that the linker composition could have significant influence on the enhancement ratio (Figure S8), but not much effect on the activation color (Figure S9).

**Table S4. DNA sequences of 32 NC probes.** Here the polycytosine heads are shown in blue, the linker in purple, and the hybridization sequence in black. No. 9 NCB (highlighted in yellow) here is the gold standard.

| Number | DNA Sequence (5'→3')                                      |
|--------|-----------------------------------------------------------|
|        | <b>NC Probe</b>                                           |
| 1      | CCC TTTT CCCC TAT AAT AAA TTT TAA ATA TTA TTT ATT AAT     |
| 2      | CCC ATTT CCCC TAT AAT AAA TTT TAA ATA TTA TTT ATT AAT     |
| 3      | CCC TATT CCCC TAT AAT AAA TTT TAA ATA TTA TTT ATT AAT     |
| 4      | CCC TTAT CCCC TAT AAT AAA TTT TAA ATA TTA TTT ATT AAT     |
| 5      | CCC TTTA CCCC TAT AAT AAA TTT TAA ATA TTA TTT ATT AAT     |
| 6      | CCC TTTT CCCC TAT AAT AAA TTT TAA ATA TTA TTT ATT AAT     |
| 7      | CCC AATT CCCC TAT AAT AAA TTT TAA ATA TTA TTT ATT AAT     |
| 8      | CCC TAAT CCCC TAT AAT AAA TTT TAA ATA TTA TTT ATT AAT     |
| 9      | CCC TTAAT CCCC TAT AAT AAA TTT TAA ATA TTA TTT ATT AAT    |
| 10     | CCC TTTAA CCCC TAT AAT AAA TTT TAA ATA TTA TTT ATT AAT    |
| 11     | CCC ATAT CCCC TAT AAT AAA TTT TAA ATA TTA TTT ATT AAT     |
| 12     | CCC TATAT CCCC TAT AAT AAA TTT TAA ATA TTA TTT ATT AAT    |
| 13     | CCC TTATA CCCC TAT AAT AAA TTT TAA ATA TTA TTT ATT AAT    |
| 14     | CCC ATTAT CCCC TAT AAT AAA TTT TAA ATA TTA TTT ATT AAT    |
| 15     | CCC TATTA CCCC TAT AAT AAA TTT TAA ATA TTA TTT ATT AAT    |
| 16     | CCC ATTTA CCCC TAT AAT AAA TTT TAA ATA TTA TTT ATT AAT    |
| 17     | CCC TTTAA CCCC TAT AAT AAA TTT TAA ATA TTA TTT ATT AAT    |
| 18     | CCC ATTAA CCCC TAT AAT AAA TTT TAA ATA TTA TTT ATT AAT    |
| 19     | CCC AATTA CCCC TAT AAT AAA TTT TAA ATA TTA TTT ATT AAT    |
| 20     | CCC AAATT CCCC TAT AAT AAA TTT TAA ATA TTA TTT ATT AAT    |
| 21     | CCC TATAA CCCC TAT AAT AAA TTT TAA ATA TTA TTT ATT AAT    |
| 22     | CCC ATATA CCCC TAT AAT AAA TTT TAA ATA TTA TTT ATT AAT    |
| 23     | CCC AATAT CCCC TAT AAT AAA TTT TAA ATA TTA TTT ATT AAT    |
| 24     | CCC TAATA CCCC TAT AAT AAA TTT TAA ATA TTA TTT ATT AAT    |
| 25     | CCC ATAAT CCCC TAT AAT AAA TTT TAA ATA TTA TTT ATT AAT    |
| 26     | CCC TAAAT CCCC TAT AAT AAA TTT TAA ATA TTA TTT ATT AAT    |
| 27     | CCC AAAAA CCCC TAT AAT AAA TTT TAA ATA TTA TTT ATT AAT    |
| 28     | CCC TAAAA CCCC TAT AAT AAA TTT TAA ATA TTA TTT ATT AAT    |
| 29     | CCC ATAAA CCCC TAT AAT AAA TTT TAA ATA TTA TTT ATT AAT    |
| 30     | CCC AATAA CCCC TAT AAT AAA TTT TAA ATA TTA TTT ATT AAT    |
| 31     | CCC AAATA CCCC TAT AAT AAA TTT TAA ATA TTA TTT ATT AAT    |
| 32     | CCC AAAAT CCCC TAT AAT AAA TTT TAA ATA TTA TTT ATT AAT    |
|        | <b>Common Enhancer Probe</b>                              |
|        | ATT AAT AAA TAA TAT TTA AAA TTT ATT ATA GGGTGGGTGGGGTGGGG |

**Table S5. Enhancement ratios of 32 NCBs.** Fluorescence was measured using a Varian Cary Eclipse Fluorescence Spectrophotometer. Emission intensities were integrated from 595 nm to 800 nm, under 580 nm excitation. The NC probe:Ag<sup>+</sup>:NaBH<sub>4</sub> molar ratio used here is 1:12:12.

| Number | Linker composition | Background Fluorescence Before Activation (a.u) | Emission Intensity After Activation (a.u) | Enhancement Ratio |
|--------|--------------------|-------------------------------------------------|-------------------------------------------|-------------------|
| 1      | TTTTT              | 16.4                                            | 10207.7                                   | 623               |
| 2      | ATTTT              | 52.1                                            | 18483.2                                   | 355               |
| 3      | TATTT              | 19.2                                            | 9730.4                                    | 507               |
| 4      | TTATT              | 11.4                                            | 7528.8                                    | 663               |
| 5      | TTTAT              | 12.0                                            | 8462.3                                    | 706               |
| 6      | TTTTA              | 28.6                                            | 17908.6                                   | 627               |
| 7      | AATTT              | 116.1                                           | 18034.4                                   | 155               |
| 8      | TAATT              | 17.3                                            | 11334.9                                   | 655               |
| 9      | TTAAT              | 10.1                                            | 15225.0                                   | 1511              |
| 10     | TTTAA              | 23.2                                            | 20164.1                                   | 871               |
| 11     | ATATT              | 101.9                                           | 8808.9                                    | 86                |
| 12     | TATAT              | 43.8                                            | 9793.1                                    | 224               |
| 13     | TTATA              | 58.8                                            | 11185.8                                   | 190               |
| 14     | ATTAT              | 74.9                                            | 14879.0                                   | 199               |
| 15     | TATTA              | 99.9                                            | 11048.8                                   | 111               |
| 16     | ATTTA              | 176.1                                           | 21050.0                                   | 120               |
| 17     | TTAAA              | 35.7                                            | 15886.8                                   | 445               |
| 18     | ATTAA              | 165.6                                           | 25700.3                                   | 155               |
| 19     | AATTA              | 178.1                                           | 10090.1                                   | 57                |
| 20     | AAATT              | 204.8                                           | 9416.7                                    | 46                |
| 21     | TATAA              | 101.2                                           | 15847.3                                   | 157               |
| 22     | ATATA              | 389.3                                           | 9691.6                                    | 25                |
| 23     | AATAT              | 153.6                                           | 16500.0                                   | 107               |
| 24     | TAATA              | 399.9                                           | 9305.2                                    | 23                |
| 25     | ATAAT              | 140.3                                           | 11741.2                                   | 84                |
| 26     | TAAAT              | 50.0                                            | 6266.1                                    | 125               |
| 27     | AAAAA              | 632.5                                           | 13386.0                                   | 21                |
| 28     | TAAAA              | 254.6                                           | 14621.4                                   | 57                |
| 29     | ATAAA              | 421.9                                           | 19591.5                                   | 46                |
| 30     | AATAA              | 472.2                                           | 11949.5                                   | 25                |
| 31     | AAATA              | 1340.1                                          | 16284.0                                   | 12                |
| 32     | AAAAT              | 275.2                                           | 10744.0                                   | 39                |

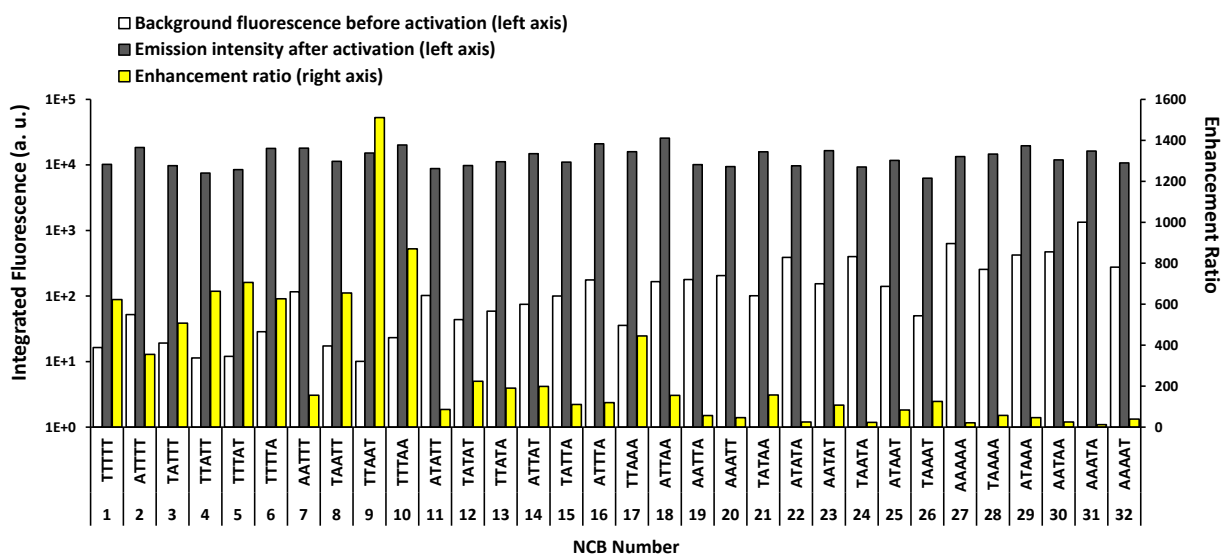

**Figure S8. Enhancement ratios of 32 NCBs.** Fluorescence was measured using a Varian Cary Eclipse Fluorescence Spectrophotometer. Emission intensities were integrated from 595 nm to 800 nm, under 580 nm excitation. No. 9 NCB is the gold standard (also C<sub>3-4</sub> and S5).

(a)

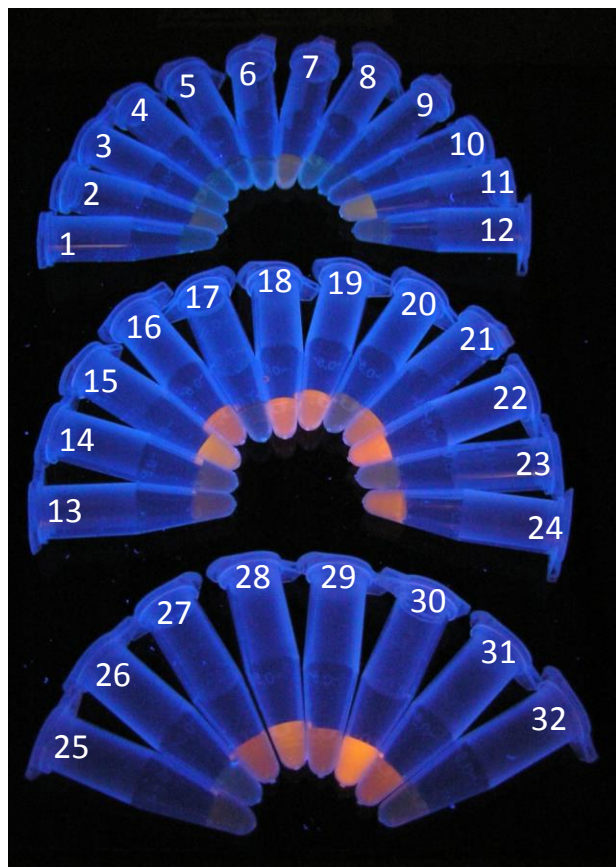

(b)

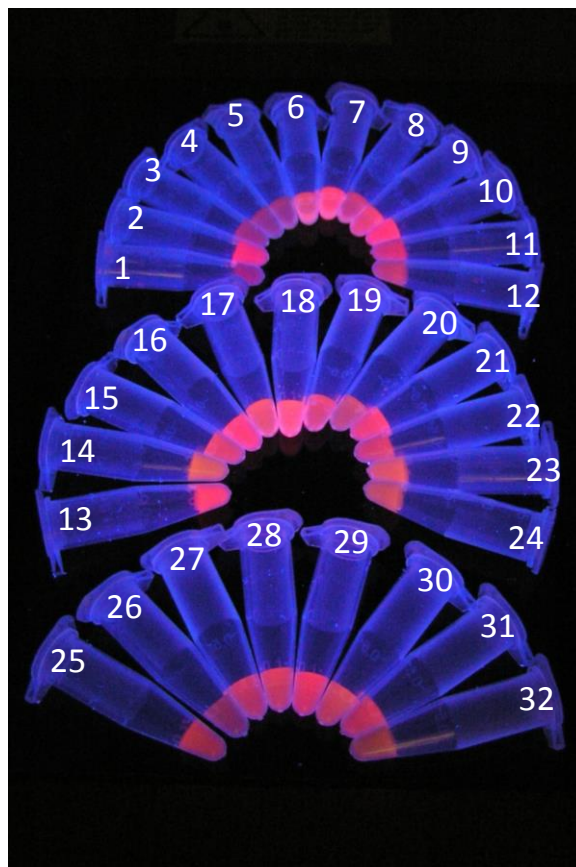

**Figure S9. Color photos of 32 NCBs.** Photos were taken under 365 nm excitation (a) before and (b) after activation.

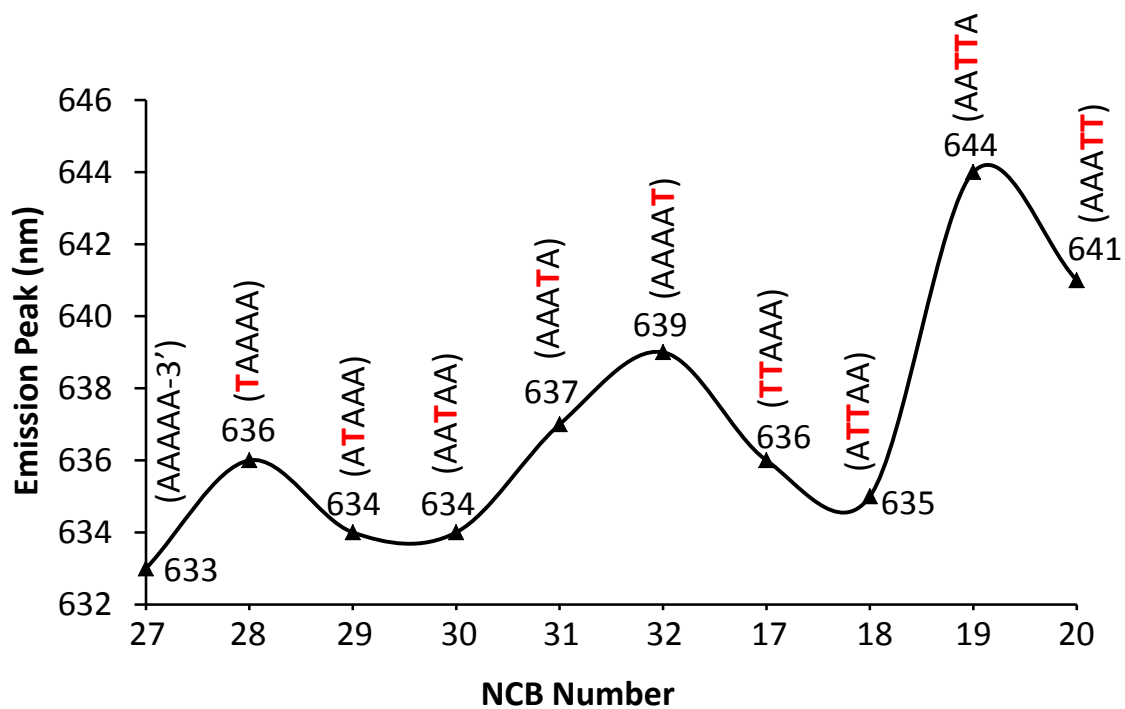

**Figure S10. Emission peaks of selected NCBs.** Here the excitation wavelength was fixed at 580 nm. In general, when the thymine sits right next to the polycytosine heads (*e.g.* No. 28 and 32 NCBs), thymine’s “emission red-shifting power” is the strongest.

### III. Symmetry on NCB's Spectral Profile

The degree of symmetry of a NCB's spectral profile was characterized by determining the eccentricity of the obtained 2D contour plot, which was fitted with an ellipse using Image J 1.48v (National Institutes of Health, USA) software. The eccentricity calculation is shown below:

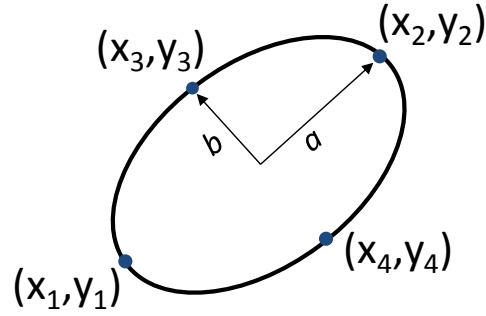

The eccentricity (E) was calculated as:

$$E = \sqrt{(a^2 - b^2)/a^2}$$

where  $a$  and  $b$  are as follows:

$$a = \frac{\sqrt{(x_1 - x_2)^2 + (y_1 - y_2)^2}}{2}$$

$$b = \frac{\sqrt{(x_3 - x_4)^2 + (y_3 - y_4)^2}}{2}$$

In this report, we defined a symmetric spectral profile as  $E < 0.66$ .

#### Reference:

- (1) Yeh, H.-C.; Sharma, J.; Han, J. J.; Martinez, J. S.; Werner, J. H. A DNA-Silver Nanocluster Probe that Fluoresces Upon Hybridization. *Nano Letters* **2010**, *10*, 3106-3110.
